# Supplementary material for: Effects of dietary intake of potatoes on body weight gain, satiety-related hormones, and gut microbiota in healthy rats
Source: Royal Society of Chemistry journal article supplement (doi:10.1039/c9ra04867g), 2019-01-01
Supplement: c9ra04867g1.pdf [file c9ra04867g1.pdf]

**Table S1.** Pearson correlation coefficients of body weight gain, food intake, tissue weights, colonic SCFAs, lipid profiles, and satiety-related hormones in Sprague-Dawley rats.

| Variables   | BWG      | Food intake | Liver  | Cecum    | SCFAs    | Acetate  | Propionate | Butyrate | BCFAs    | TC       | TG       | HDL     | LDL      | PYY      | GLP-1    |
|-------------|----------|-------------|--------|----------|----------|----------|------------|----------|----------|----------|----------|---------|----------|----------|----------|
| BWG         |          | 0.721**     | 0.147  | -0.630** | -0.629** | -0.557** | -0.708**   | -0.734** | -0.525** | 0.613**  | 0.674**  | 0.501** | 0.622**  | -0.463** | -0.583** |
| Food intake | 0.721**  |             | -0.095 | -0.771** | -0.942** | -0.881** | -0.910**   | -0.917** | -0.865** | 0.400*   | 0.659**  | 0.236   | 0.735**  | -0.484** | -0.742** |
| Liver       | 0.147    | -0.095      |        | 0.389*   | -0.020   | -0.089   | 0.112      | 0.168    | -0.134   | 0.234    | 0.080    | 0.153   | 0.198    | -0.175   | 0.211    |
| Cecum       | -0.630** | -0.771**    | 0.389* |          | 0.598**  | 0.490**  | 0.745**    | 0.807**  | 0.473**  | -0.207   | -0.505** | -0.108  | -0.422*  | 0.316    | 0.621**  |
| SCFAs       | -0.629** | -0.942**    | -0.020 | 0.598**  |          | 0.983**  | 0.889**    | 0.838**  | 0.943**  | -0.463** | -0.596** | -0.304  | -0.780** | 0.493**  | 0.707**  |
| Acetate     | -0.557** | -0.881**    | -0.089 | 0.490**  | 0.983**  |          | 0.809**    | 0.735**  | 0.944**  | -0.475** | -0.542** | -0.322  | -0.773** | 0.504**  | 0.652**  |
| Propionate  | -0.708** | -0.910**    | 0.112  | 0.745**  | 0.889**  | 0.809**  |            | 0.931**  | 0.806**  | -0.407*  | -0.576** | -0.260  | -0.696** | 0.464**  | 0.702**  |
| Butyrate    | -0.734** | -0.917**    | 0.168  | 0.807**  | 0.838**  | 0.735**  | 0.931**    |          | 0.749**  | -0.342   | -0.657** | -0.198  | -0.617** | 0.345    | 0.771**  |
| BCFAs       | -0.525** | -0.865**    | -0.134 | 0.473**  | 0.943**  | 0.944**  | 0.806**    | 0.749**  |          | -0.372*  | -0.647** | -0.206  | -0.779** | 0.611**  | 0.655**  |
| TC          | 0.613**  | 0.400*      | 0.234  | -0.207   | -0.463** | -0.475** | -0.407*    | -0.342   | -0.372*  |          | 0.390*   | 0.946** | 0.622**  | -0.392*  | -0.346   |
| TG          | 0.674**  | 0.659**     | 0.080  | -0.505** | -0.596** | -0.542** | -0.576**   | -0.657** | -0.647** | 0.390*   |          | 0.296   | 0.637**  | -0.497** | -0.638** |
| HDL         | 0.501**  | 0.236       | 0.153  | -0.108   | -0.304   | -0.322   | -0.260     | -0.198   | -0.206   | 0.946**  | 0.296    |         | 0.421*   | -0.271   | -0.316   |
| LDL         | 0.622**  | 0.735**     | 0.198  | -0.422*  | -0.780** | -0.773** | -0.696**   | -0.617** | -0.779** | 0.622**  | 0.637**  | 0.421*  |          | -0.635** | -0.472** |
| PYY         | -0.463** | -0.484**    | -0.175 | 0.316    | 0.493**  | 0.504**  | 0.464**    | 0.345    | 0.611**  | -0.392*  | -0.497** | -0.271  | -0.635** |          | 0.314    |
| GLP-1       | -0.583** | -0.742**    | 0.211  | 0.621**  | 0.707**  | 0.652**  | 0.702**    | 0.771**  | 0.655**  | -0.346   | -0.638** | -0.316  | -0.472** | 0.314    |          |

Only significantly correlated variables and coefficients are shown. BWG: body weight gain; SCFAs: short chain fatty acids; BCFAs: branched-chain fatty acids; TC: total cholesterol; TG: triglyceride; HDL: high-density lipoproteins; LDL: low-density lipoproteins.

\*\*  $p < 0.01$ .

\*  $p < 0.05$ .

**Table S2.** Combined effects of food intake, tissue weights, lipid profiles, satiety-related hormones, and colonic SCFAs on body weight gain in rats.

|         | Variables <sup>a</sup> | $R_{adjust}^2$ | $\beta$ | $p$   |
|---------|------------------------|----------------|---------|-------|
| Model 1 | Butyrate               | 0.524          | -0.734  | 0.000 |
| Model 2 | Butyrate               |                | -0.594  | 0.000 |
|         | TC                     | 0.666          | 0.410   | 0.001 |

<sup>a</sup> Based on Pearson correlation analysis between food intake, tissue weights, colonic SCFAs, lipid profiles, and/or satiety-related hormones significantly associated with body weight gain. TC: total cholesterol.

**Table S3.** The relative abundance of gut bacterial phyla in rats.

| <b>Phylum</b>          | <b>CO</b> | <b>PL</b> | <b>PM</b> | <b>PH</b> | <b>PHer</b> | <b><i>p</i> value<sup>1</sup></b> |
|------------------------|-----------|-----------|-----------|-----------|-------------|-----------------------------------|
| Firmicutes             | 0.627     | 0.568     | 0.477     | 0.426     | 0.398       | 0.005**                           |
| Bacteroidetes          | 0.264     | 0.357     | 0.389     | 0.416     | 0.378       | 0.035*                            |
| Actinobacteria         | 0.00779   | 0.0419    | 0.0890    | 0.130     | 0.194       | 0.031*                            |
| Proteobacteria         | 0.0376    | 0.0165    | 0.0198    | 0.0146    | 0.0200      | 0.065                             |
| Tenericutes            | 0.0531    | 0.00891   | 0.0131    | 0.00743   | 0.00171     | 0.017*                            |
| Verrucomicrobia        | 0.00581   | 0.00449   | 0.0110    | 0.00368   | 0.00434     | 0.207                             |
| Cyanobacteria          | 0.00308   | 0.000694  | 0.000361  | 0.00220   | 0.00312     | 0.023*                            |
| Deferribacteres        | 0.00113   | 0.00186   | 0.000144  | 0.0000421 | 0.0000252   | 0.292                             |
| unclassified_k__norank | 0.000326  | 0.0000789 | 0.000313  | 0.000349  | 0.000320    | 0.317                             |
| Others (< 0.01%)       | 0.0000947 | 0.0000421 | 0.0000240 | 0.0000120 | 0.0000337   | -                                 |

<sup>1</sup> Kruskal-Wallis H test for multi-group comparison. CO: rats fed with an AIN-93 G diet; PH: rats fed with a high concentration of potato diet; PHer: rats fed with a higher concentration of potato diet.

\*\*  $p < 0.01$ , \*  $p < 0.05$ .

**Table S4.** The relative abundance of gut bacterial genera in rats.

| Genus                               | CO        | PL       | PM       | PH       | PHer     |
|-------------------------------------|-----------|----------|----------|----------|----------|
| norank_f__Bacteroidales_S24-7_group | 0.104     | 0.210    | 0.220    | 0.292    | 0.231    |
| Bifidobacterium                     | 0.000631  | 0.0350   | 0.0850   | 0.122    | 0.187    |
| Bacteroides                         | 0.127     | 0.0789   | 0.0987   | 0.0546   | 0.0243   |
| unclassified_f__Lachnospiraceae     | 0.115     | 0.101    | 0.0497   | 0.0261   | 0.00606  |
| Ruminococcaceae_UCG-005             | 0.0314    | 0.0522   | 0.0518   | 0.0717   | 0.0683   |
| Phascolarctobacterium               | 0.0490    | 0.0507   | 0.0588   | 0.0552   | 0.0317   |
| Prevotellaceae_NK3B31_group         | 0.0000421 | 0.0333   | 0.0407   | 0.0482   | 0.103    |
| Lactobacillus                       | 0.0103    | 0.0213   | 0.0213   | 0.0195   | 0.124    |
| Ruminococcus_2                      | 0.0200    | 0.0910   | 0.0492   | 0.0115   | 0.00794  |
| Ruminococcaceae_UCG-014             | 0.0302    | 0.0265   | 0.0322   | 0.0283   | 0.0242   |
| Romboutsia                          | 0.0273    | 0.0121   | 0.0518   | 0.0209   | 0.01150  |
| Blautia                             | 0.0241    | 0.0299   | 0.0140   | 0.0295   | 0.0179   |
| Lachnospiraceae_NK4A136_group       | 0.01701   | 0.00849  | 0.00981  | 0.0458   | 0.0159   |
| norank_f__Lachnospiraceae           | 0.0409    | 0.0241   | 0.00858  | 0.00485  | 0.00215  |
| norank_o__Mollicutes_RF9            | 0.0528    | 0.00718  | 0.0103   | 0.00642  | 0.000808 |
| Turicibacter                        | 0.00133   | 0.00200  | 0.0198   | 0.0285   | 0.0130   |
| [Ruminococcus]_gauvreauii_group     | 0.0158    | 0.0222   | 0.0163   | 0.00615  | 0.00213  |
| norank_f__Ruminococcaceae           | 0.0191    | 0.00980  | 0.0115   | 0.0101   | 0.00923  |
| Butyricimonas                       | 0.0104    | 0.0144   | 0.0155   | 0.00793  | 0.00661  |
| [Ruminococcus]_torques_group        | 0.0341    | 0.00952  | 0.00237  | 0.00249  | 0.00256  |
| Parabacteroides                     | 0.0125    | 0.0116   | 0.00719  | 0.00623  | 0.00660  |
| Ruminococcus_1                      | 0.000137  | 0.0133   | 0.00646  | 0.0112   | 0.0104   |
| unclassified_f__Ruminococcaceae     | 0.0117    | 0.00837  | 0.00616  | 0.00540  | 0.00604  |
| Lachnospiraceae_UCG-010             | 0.0260    | 0.000694 | 0.00102  | 0.000835 | 0.00144  |
| Akkermansia                         | 0.00581   | 0.00449  | 0.0110   | 0.00368  | 0.00434  |
| Lachnoclostridium                   | 0.0103    | 0.00406  | 0.00426  | 0.00739  | 0.00201  |
| Desulfovibrio                       | 0.0127    | 0.00377  | 0.00531  | 0.00156  | 0.00162  |
| Anaerotruncus                       | 0.0139    | 0.00452  | 0.00284  | 0.00227  | 0.00132  |
| Parasutterella                      | 0.0000631 | 0.000826 | 0.000835 | 0.00700  | 0.0159   |
| Bilophila                           | 0.0101    | 0.00462  | 0.00234  | 0.00270  | 0.00142  |
| Family_XIII_AD3011_group            | 0.0102    | 0.00409  | 0.00170  | 0.00121  | 0.000194 |
| Others (< 1%)                       | 0.156     | 0.101    | 0.0835   | 0.0589   | 0.0602   |

**Table S5.** Proportion of total variance in principal co-ordinate analysis (PCoA).

| Proportion of Variance |        | Proportion of Variance |       |
|------------------------|--------|------------------------|-------|
| PC1                    | 26.98% | PC20                   | 1.39% |
| PC2                    | 7.37%  | PC21                   | 1.35% |
| PC3                    | 5.79%  | PC22                   | 1.23% |
| PC4                    | 5.58%  | PC23                   | 1.20% |
| PC5                    | 4.46%  | PC24                   | 1.08% |
| PC6                    | 4.20%  | PC25                   | 0.96% |
| PC7                    | 3.94%  | PC26                   | 0.88% |
| PC8                    | 3.53%  | PC27                   | 0.84% |
| PC9                    | 3.27%  | PC28                   | 0.65% |
| PC10                   | 3.14%  | PC29                   | 0.60% |
| PC11                   | 2.77%  | PC30                   | 0.56% |
| PC12                   | 2.48%  | PC31                   | 0.44% |
| PC13                   | 2.30%  | PC32                   | 0.37% |
| PC14                   | 2.21%  | PC33                   | 0.28% |
| PC15                   | 2.16%  | PC34                   | 0.19% |
| PC16                   | 2.00%  | PC35                   | 0.10% |
| PC17                   | 1.96%  | PC36                   | 0.00% |
| PC18                   | 1.84%  | PC37                   | 0.15% |
| PC19                   | 1.72%  |                        |       |

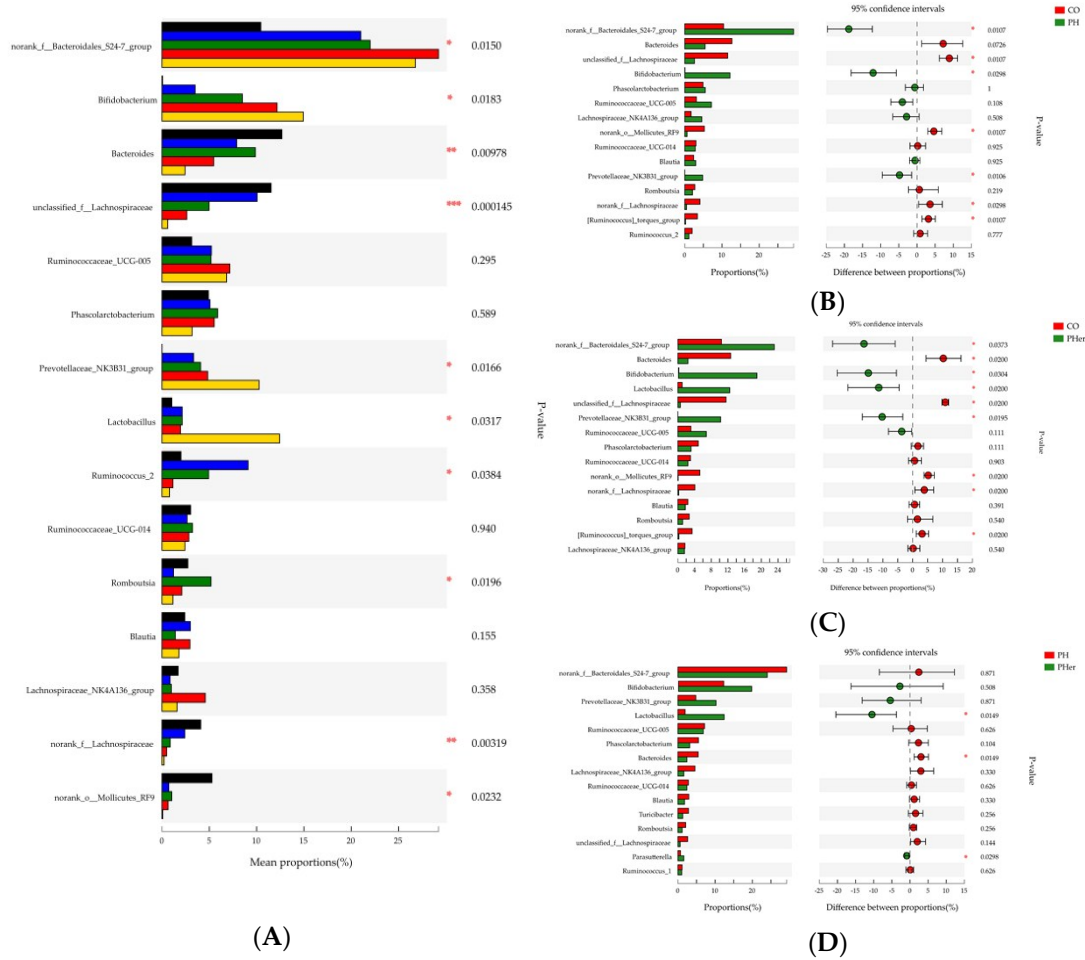

**Fig. S1.** Bar plots of the intergroup differences between relative abundance (top 15 OTUs) of bacterial communities in rats fed different diets at genus level. **(A)** Kruskal-Wallis H test for multi-group comparison; Mann-Whitney U test for pairwise comparison: CO vs. PH **(B)**; CO vs. PHer **(C)**; PH vs. PHer **(D)**. CO: rats fed with an AIN-93 G diet; PH: rats fed with a high concentration of potato diet; PHer: rats fed with a higher concentration of potato diet. \*\*\*  $p < 0.001$ , \*\*  $p < 0.01$ , \*  $p < 0.05$ .
